# Supplementary material for: Recumbent cycling with integrated volitional control electrical stimulation improves gait speed during the recovery stage in stroke patients
Source: PubMed Central journal article supplement — J Exerc Rehabil. 2019 Feb 25;15(1):95–102. doi: 10.12965/jer.1836500.250 (PMC6416497; doi:10.12965/jer.1836500.250), 2019-02-25
Supplement: jer-15-1-95-suppl1.pdf [file jer-15-1-95-suppl1.pdf]

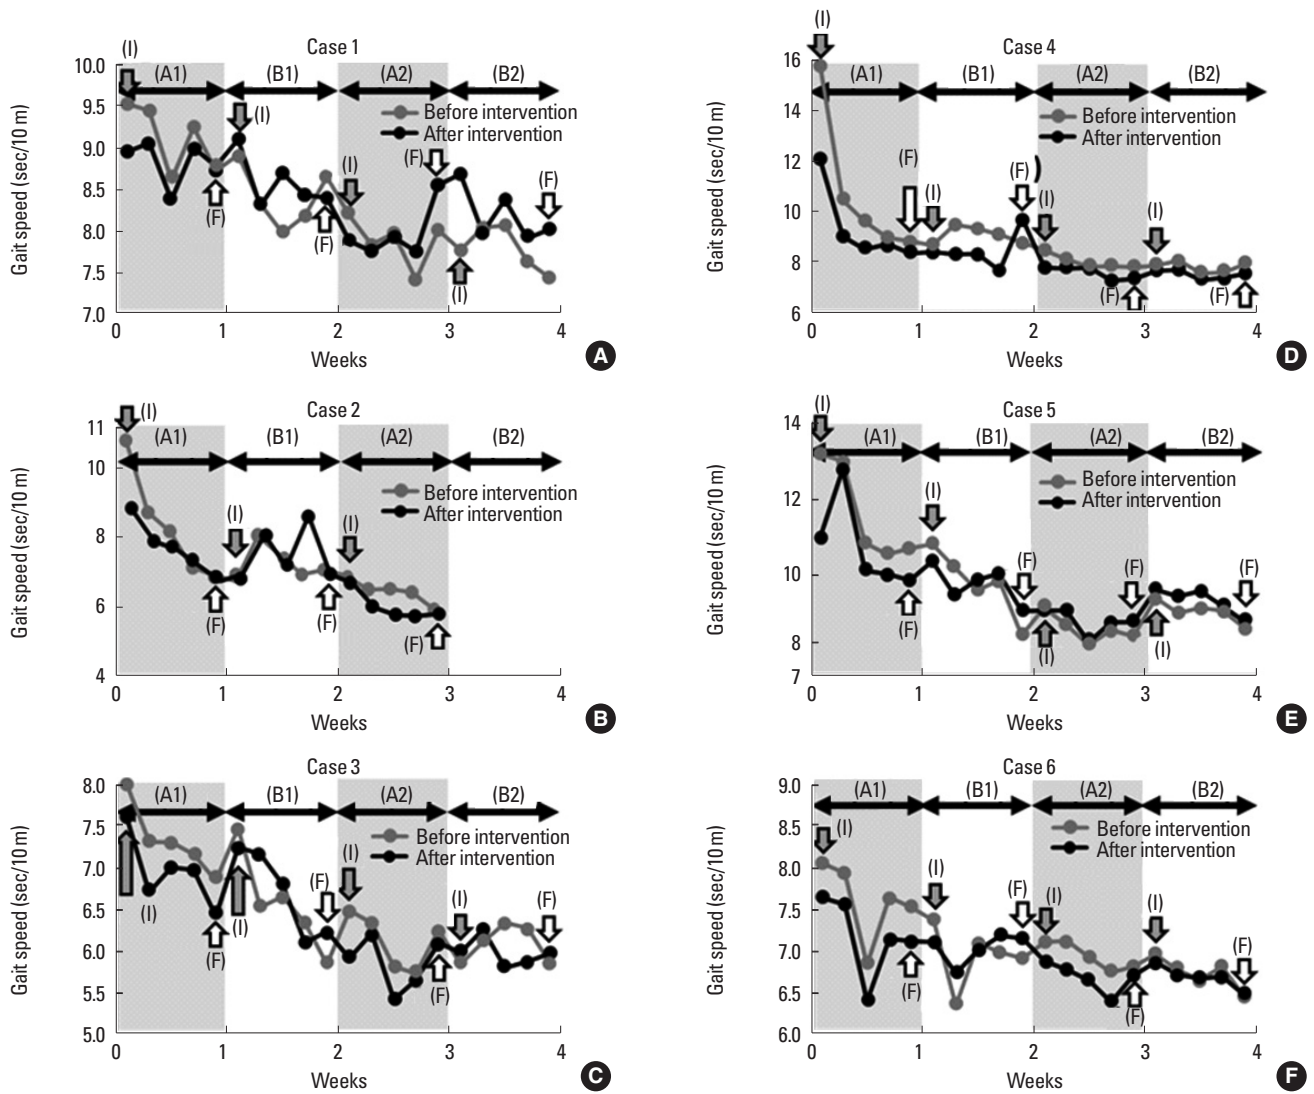

**Supplementary Fig. 1.** The change in gait speed before and after intervention is shown for each case. Case 1 (A), case 2 (B), case 3 (C), case 4 (D), case 5 (E), and case 6 (F).
